# Supplementary material for: Ligand-based pharmacophore modeling, virtual screening and biological evaluation to identify novel TGR5 agonists
Source: Royal Society of Chemistry journal article supplement (doi:10.1039/d0ra10168k), 2021-01-01
Supplement: d0ra10168k1.pdf [file d0ra10168k1.pdf]

## Supporting Information

# **Ligand-Based pharmacophore modeling, Virtual screening and Biological Evaluation to identify novel TGR5 agonists**

Shizhen Zhao <sup>a</sup>, Xinping Li <sup>a</sup>, Wenjing Peng <sup>a</sup>, Le Wang <sup>a</sup>, Wenling Ye <sup>a</sup>, Yang Zhao <sup>a</sup>,  
Wenbo Yin <sup>c</sup>, Wei-Dong Chen <sup>a, b</sup>, Weiguo Li <sup>a, \*</sup>, Yan-Dong Wang <sup>d, \*</sup>

<sup>a</sup> *Key Laboratory of Receptors-Mediated Gene Regulation and Drug Discovery, People's Hospital of Hebi, School of Medicine, Henan University, Henan, China*

<sup>b</sup> *Key Laboratory of Molecular Pathology, School of Basic Medical Science, Inner Mongolia Medical University, Hohhot, China*

<sup>c</sup> *Key Laboratory of Structure-Based Drug Design and Discovery, Ministry of Education, School of Pharmaceutical Engineering, Shenyang Pharmaceutical University, 103 Wenhua Road, Shenhe District, Shenyang 110016, PR China*

<sup>d</sup> *State Key Laboratory of Chemical Resource Engineering, College of Life Science and Technology, Beijing University of Chemical Technology, Beijing, China*

\*Corresponding authors: E-mail addresses: ydwbuct2009@163.com (Y.-D.W.);

hb\_lwg@163.com (W.L)

## Contents

**Figure S1** The dose–response curves of the compounds **V12** and **V14**.

**Table S1** The glide score and commercial source of hit compounds **V1-20**.

**Table S2** The glide score of other top 65 compounds.

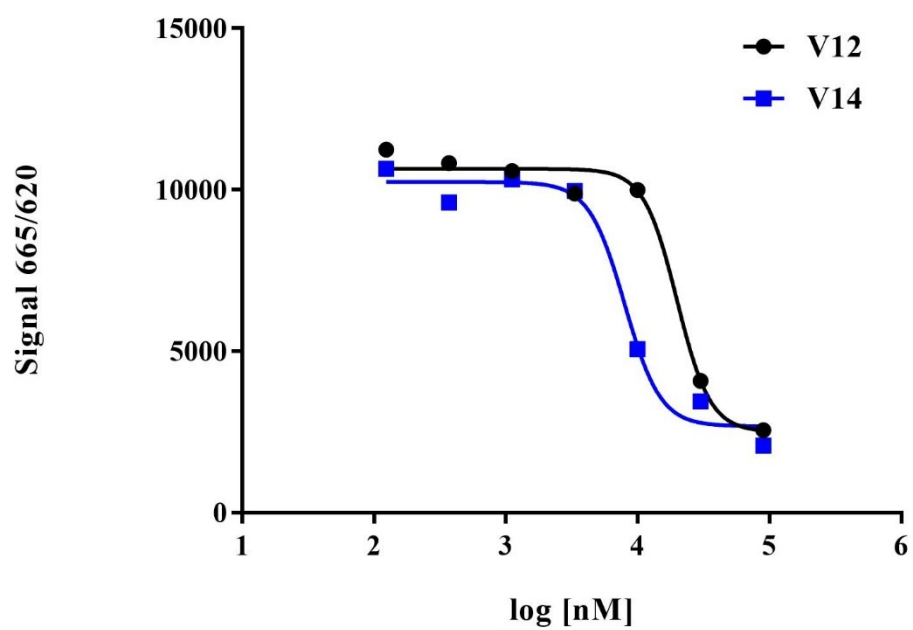

**Figure S1** The dose–response curves of the compounds V12 and V14.

**Table S1** The glide score and commercial source of hit compounds V1-20.

| <b>Comp.</b> | <b>Glide XP Gscore</b> | <b>Glide emodel (kcal·mol<sup>-1</sup>)</b> | <b>commercial source</b> |
|--------------|------------------------|---------------------------------------------|--------------------------|
| V1           | -8.626                 | -80.012                                     | Target Molecule Corp.    |
| V2           | -8.858                 | -71.579                                     | Target Molecule Corp.    |
| V3           | -7.074                 | -80.520                                     | Target Molecule Corp.    |
| V4           | -8.496                 | -56.935                                     | Target Molecule Corp.    |
| V5           | -7.173                 | -63.129                                     | Target Molecule Corp.    |
| V6           | -9.653                 | -56.652                                     | Target Molecule Corp.    |
| V7           | -9.956                 | -67.126                                     | Target Molecule Corp.    |
| V8           | -8.521                 | -84.647                                     | Target Molecule Corp.    |
| V9           | -7.062                 | -63.258                                     | Target Molecule Corp.    |
| V10          | -6.972                 | -47.228                                     | Target Molecule Corp.    |
| V11          | -9.750                 | -50.516                                     | Target Molecule Corp.    |
| V12          | 7.002                  | -64.057                                     | Target Molecule Corp.    |
| V13          | -6.967                 | -64.923                                     | Target Molecule Corp.    |
| V14          | -8.160                 | -63.320                                     | Target Molecule Corp.    |
| V15          | -7.805                 | -68.399                                     | Target Molecule Corp.    |
| V16          | -7.021                 | -60.181                                     | Target Molecule Corp.    |
| V17          | -8.164                 | -64.060                                     | In our library           |
| V18          | -7.627                 | -54.656                                     | Target Molecule Corp.    |
| V19          | -7.407                 | -56.082                                     | Target Molecule Corp.    |
| V20          | -7.481                 | -56.435                                     | Target Molecule Corp.    |

**Table S2** The glide score of other top 65 compounds.

| <b>Ligand No.</b> | <b>CAS</b>   | <b>Glide XP Gscore</b> | <b>Glide emodel<br/>(kcal·mol<sup>-1</sup>)</b> |
|-------------------|--------------|------------------------|-------------------------------------------------|
| 1                 | 1135242-13-5 | -7.403                 | -63.866                                         |
| 2                 | 117-81-7     | -7.392                 | -61.343                                         |
| 3                 | 298690-60-5  | -7.383                 | -53.146                                         |
| 4                 | 1445605-23-1 | -7.337                 | -49.036                                         |
| 5                 | 1226056-71-8 | -7.286                 | -63.562                                         |
| 6                 | 164650-44-6  | -7.300                 | -51.468                                         |
| 7                 | 956905-27-4  | -7.259                 | -81.585                                         |
| 8                 | 168626-94-6  | -8.034                 | -61.678                                         |
| 9                 | 162011-90-7  | -7.256                 | -69.577                                         |
| 10                | 1346528-50-4 | -7.409                 | -60.317                                         |
| 11                | 957485-64-2  | -7.241                 | -65.118                                         |
| 12                | 985-13-7     | -8.424                 | -75.227                                         |
| 13                | 1402836-58-1 | -7.400                 | -55.780                                         |
| 14                | 52-86-8      | -9.472                 | -64.050                                         |
| 15                | 5633-20-5    | -8.449                 | -54.601                                         |
| 16                | 1246529-32-7 | -7.236                 | -44.139                                         |
| 17                | 873652-48-3  | -8.488                 | -77.078                                         |
| 18                | 122320-73-4  | -8.551                 | -65.187                                         |
| 19                | 1173-88-2    | -7.155                 | -59.045                                         |
| 20                | 133824-30-5  | -7.131                 | -63.188                                         |
| 21                | 1108743-60-7 | -7.126                 | -40.817                                         |
| 22                | 888216-25-9  | -7.132                 | -71.594                                         |
| 23                | 1208315-24-5 | -7.132                 | -56.807                                         |
| 24                | 1445251-22-8 | -7.146                 | -67.307                                         |
| 25                | 694433-59-5  | -7.503                 | -56.929                                         |
| 26                | 355025-24-0  | -7.092                 | -84.005                                         |
| 27                | 68786-66-3   | -7.270                 | -38.212                                         |
| 28                | 32672-69-7   | -7.087                 | -59.870                                         |
| 29                | 1622921-15-6 | -7.381                 | -60.607                                         |
| 30                | 1042224-63-4 | -7.111                 | -62.009                                         |
| 31                | 64872-77-1   | -7.445                 | -62.658                                         |
| 32                | 943962-47-8  | -8.696                 | -75.134                                         |
| 33                | 14976-57-9   | -7.054                 | -48.838                                         |
| 34                | 1110813-31-4 | -8.318                 | -52.937                                         |
| 35                | 1135280-28-2 | -8.331                 | -76.796                                         |
| 36                | 99592-39-9   | -7.272                 | -69.721                                         |
| 37                | 89796-99-6   | -6.969                 | -50.055                                         |
| 38                | 817194-38-0  | -6.977                 | -67.735                                         |
| 39                | 298197-04-3  | -6.944                 | -47.685                                         |
| 40                | 6138-79-0    | -6.935                 | -47.373                                         |
| 41                | 896466-04-9  | -8.320                 | -71.779                                         |

---

|    |              |        |         |
|----|--------------|--------|---------|
| 42 | 947914-18-3  | -6.919 | 63.372  |
| 43 | 18010-40-7   | -6.971 | -41.379 |
| 44 | 792173-99-0  | -6.903 | -63.511 |
| 45 | 1439399-58-2 | -8.476 | -85.681 |

---
